# Supplementary material for: Solar light active plasmonic Au@TiO2 nanocomposite with superior photocatalytic performance for H2 production and pollutant degradation
Source: Royal Society of Chemistry journal article supplement (doi:10.1039/c8nj01410h), 2018-01-01
Supplement: c8nj01410h1.pdf [file c8nj01410h1.pdf]

**Solar light active plasmonic Au@TiO<sub>2</sub> nanocomposite with superior photocatalytic performance for H<sub>2</sub> production and pollutant degradation**

Supriya K. Khore,<sup>1</sup> Sunil. R. Kadam,<sup>2,1</sup> Sonali D. Naik,<sup>1</sup> Bharat B. Kale,<sup>1</sup> Ravindra S. Sonawane<sup>1\*</sup>

<sup>1</sup>Centre for Materials for Electronic Technology, Government of India, Panchawati, off Pashan Road, Pune 411008,  
India

<sup>2</sup>Centre for Advanced Studies in Materials Science, Department of Physics, Savitribai Phule Pune University,  
(Formerly University of Pune) Ganeshkhind, Pune -411007, INDIA

**Corresponding Author:** [sonawane@yahoo.com](mailto:sonawane@yahoo.com), [sonawane@cmet.gov.in](mailto:sonawane@cmet.gov.in)

**Electronic Supplementary Information**

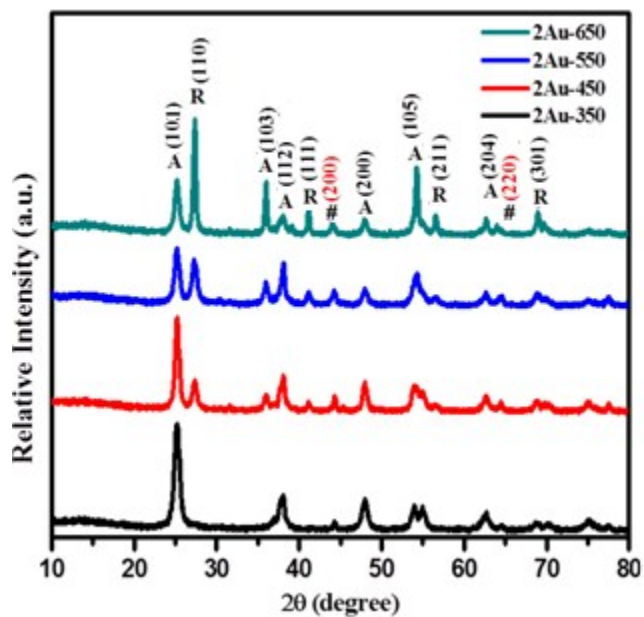

Fig.S1 XRD pattern of 2% Au -TiO<sub>2</sub> calcined at 350, 450, 550 and 650 °C.

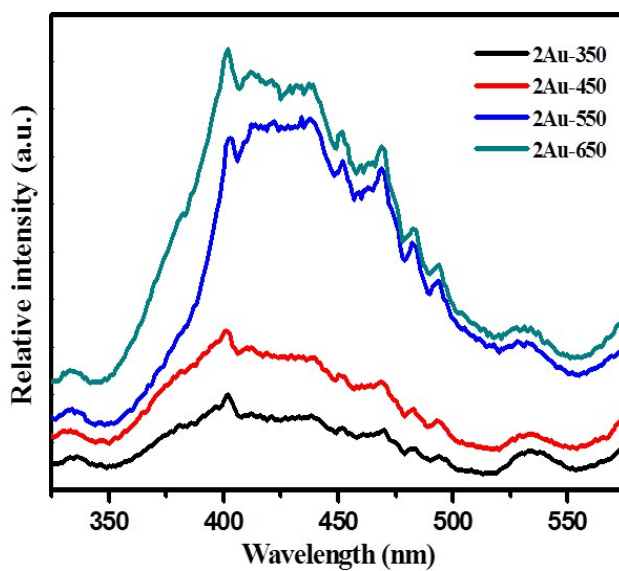

Fig.S2 Photoluminescence spectra of 2% Au -TiO<sub>2</sub> calcined at different temperatures.

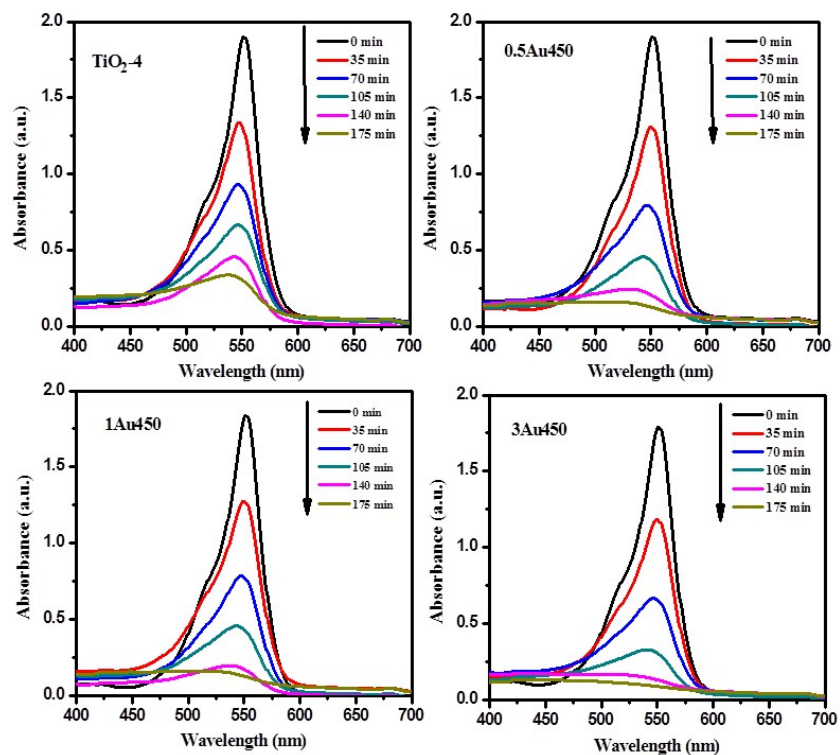

Fig.S3 UV-visible absorption spectrum of Rhodamine B degradation using  $\text{TiO}_2$ -4, 0.5Au450, 1Au450 and 3Au450 photo-catalysts.

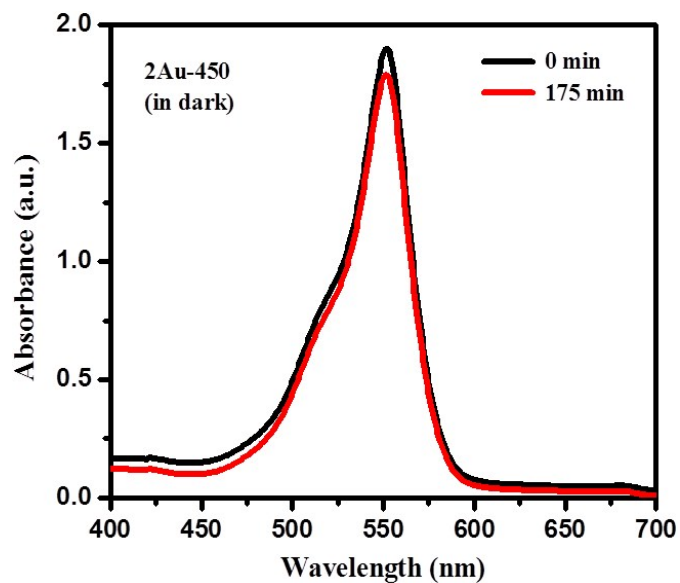

Fig.S4 UV-visible absorption spectrum of Rhodamine B kept in dark in presence of 2Au-450 photocatalyst.

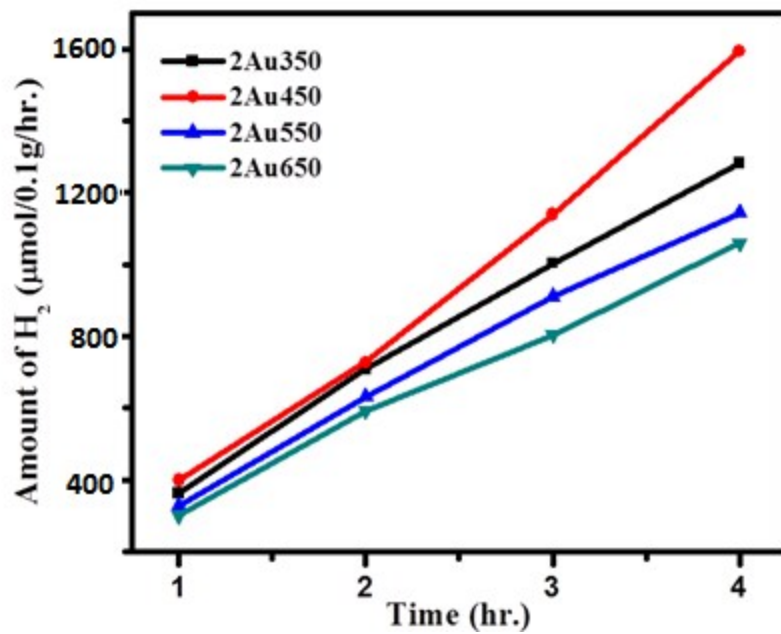

Fig.S5 Amount of H<sub>2</sub> (μmol/0.1g/hr) produced with time using 2% Au -TiO<sub>2</sub> calcined at different temperatures.

Table.S1. Photocatalytic H<sub>2</sub> production using 2% Au- TiO<sub>2</sub> calcined at different temperatures.

| Sr. No. | Photocatalyst name | H <sub>2</sub> Production (μmol/0.1g/hr) |
|---------|--------------------|------------------------------------------|
| 1.      | 2Au-350            | 321                                      |
| 2.      | 2Au-450            | 399                                      |
| 3.      | 2Au-550            | 286                                      |
| 4.      | 2Au-650            | 265                                      |
